# Supplementary material
Source: PubMed Central journal article supplement (PMC2945561)
Supplement: supp_M110.129346_SUPPLEMENTAL_DATA_Article_n_3285__M110.129346.pdf [file supp_M110.129346_SUPPLEMENTAL_DATA_Article_n_3285__M110.129346.pdf]

SUPPLEMENTAL DATA

**Table S1.**

**Identification of recombinant protein obtained in *E. coli* (54% sequence coverage) and native protein purified from ESPs (51% sequence coverage) by MALDI-TOF/TOF analysis.** The peptides were obtained using trypsin and the mass spectra search was performed by MASCOT software. The following parameters were stated: missed-cleavage, one; peptide tolerance, 50 ppm; fragment mass tolerance, 0.3 Da; fixed modification, carbamidomethylation of cysteine; and variable modification, methionine oxidation.

| Calc. Mass                  | Error (ppm) | Peptides                             | Ion Score  | Score <sup>1</sup> |
|-----------------------------|-------------|--------------------------------------|------------|--------------------|
| <b>Recombinante Sc-SP-1</b> |             |                                      | <b>768</b> |                    |
| 828.440                     | 37          | YPPFVVR*                             | 70         |                    |
| 948.4938                    | 35          | WPDVYLR*                             | 62         |                    |
| 1217.679                    | 31          | LRWPDVYLR*                           | 45         |                    |
| 1222.5919                   | 28          | MLCGGSLLTDR                          | 78         |                    |
| 1472.7792                   | 29          | HVLTVSHCVVGHK*                       | 86         |                    |
| 1717.8789                   | 28          | GVVQVGMLIGATNSDEK*                   | 38         |                    |
| 1844.9187                   | 31          | YPPFVRLEMVMNNGK                      |            |                    |
| 1987.0641                   | 27          | GVVQVGMLIGATNSDEKLR*                 | 70         |                    |
| 2180.8689                   | 28          | TSYFCDFFAQATGNAFSCS*                 | 65         |                    |
| 2629.2788                   | 34          | IVCTVGPBGTHGAGAGESGGPLVAQDGK*        | 92         |                    |
| 2915.4421                   | 36          | HYDDINNVAVIELSSPVDFATATAQPAK*        | 66         |                    |
| 3386.6394                   | 31          | IATDNDKIVCTVGPBGTHGAGAGESGGPLVAQDGK* | 79         |                    |
| <b>Native Sc-SP-1</b>       |             |                                      | <b>708</b> |                    |
| 874.4741                    | 7           | ILRDDSR*                             | 52         |                    |
| 888.3669                    | 6           | FDYCQR*                              | 67         |                    |
| 922.4854                    | 8           | TLHNPQGR*                            | 68         |                    |
| 948.4938                    | 5           | WPDVYLR*                             | 65         |                    |
| 1217.679                    | 7           | LRWPDVYLR*                           | 72         |                    |
| 1717.8789                   | 16          | GVVQVGMLIGATNSDEK                    |            |                    |
| 1987.0542                   | 7           | HVLTVSHCVVGHKLGESK                   |            |                    |
| 2003.0591                   | 12          | GVVQVGMLIGATNSDEKLR*                 | 73         |                    |
| 2629.2788                   | 12          | IVCTVGPBGTHGAGAGESGGPLVAQDGK*        | 95         |                    |
| 2915.4421                   | 10          | HYDDINNVAVIELSSPVDFATATAQPAK*        | 81         |                    |
| 3386.6394                   | 7           | IATDNDKIVCTVGPBGTHGAGAGESGGPLVAQDGK* | 110        |                    |

\* peptides that were obtained the MS/MS sequences; 1, scores obtained with Mowse algorithm (scores >100 are significant with p<0.05); ppm –parts per million.

14 **FIGURE S1.**  
15

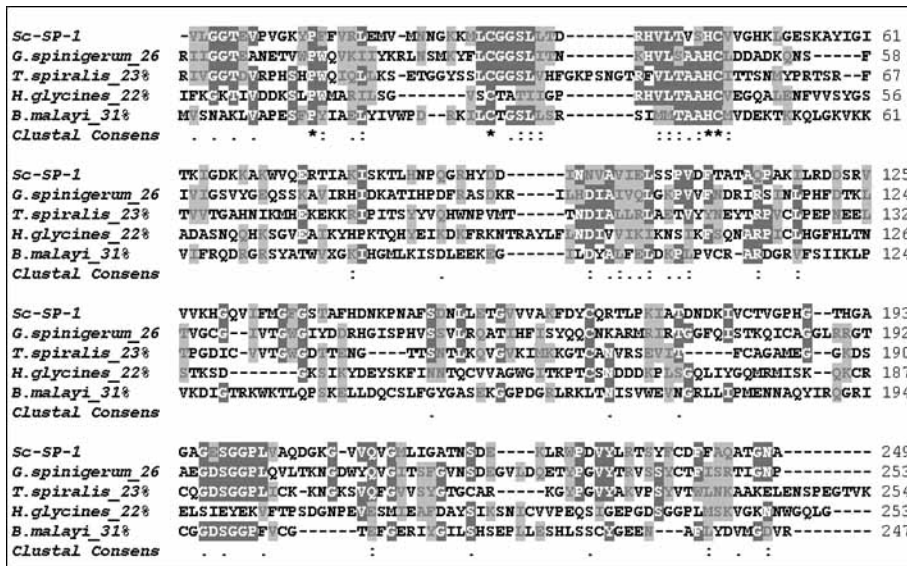

16  
17  
18 **Comparison of the Sc-SP-1 deduced amino acid sequence with the amino acid sequences of**  
19 **selected homologous molecules.** Alignment of catalytic domains of nematode serine proteases  
20 family. Percentages represent identity with Sc-SP-1. The sequences were *Brugia malayi* (NCBI  
21 Accession XP\_001900587), *T. spiralis* (AAK16520), *Heterodera glycines* (CAA74206),  
22 *Gnathostoma spinigerum* (ACA30304) and *C. elegans* (NP\_500999). Identical residues are marked  
23 with “\*”, conserved substitutions with “:” and semi-conserved substitutions with “.” below the  
24 sequences  
25

26 **FIGURE S2.**  
27

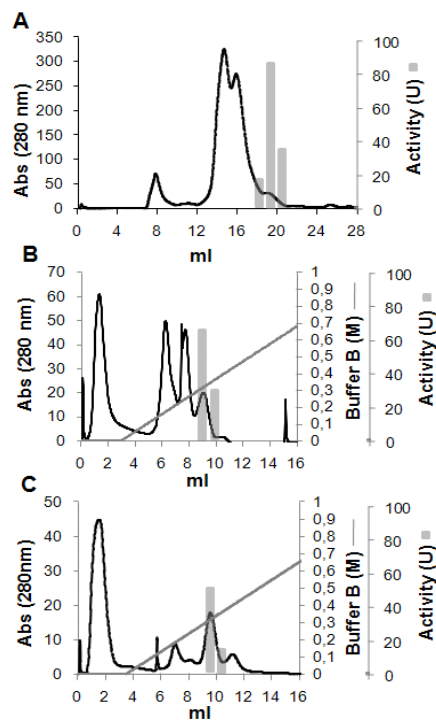

28  
29 **Chromatographic profiles of native protease purification from ESPs of the *S. carpopapsae***  
30 **parasitic stage.** Three steps were sequentially run: Gel filtration (**A**); Hitrap SP (**B**) and Mono S  
31 (**C**). proteolytic activity was measured in the substrate AAPF-pNA. Vertical grey bars indicate  
32 proteolytic activity in the fractions.  
33

34 **FIGURE S3.**  
 35

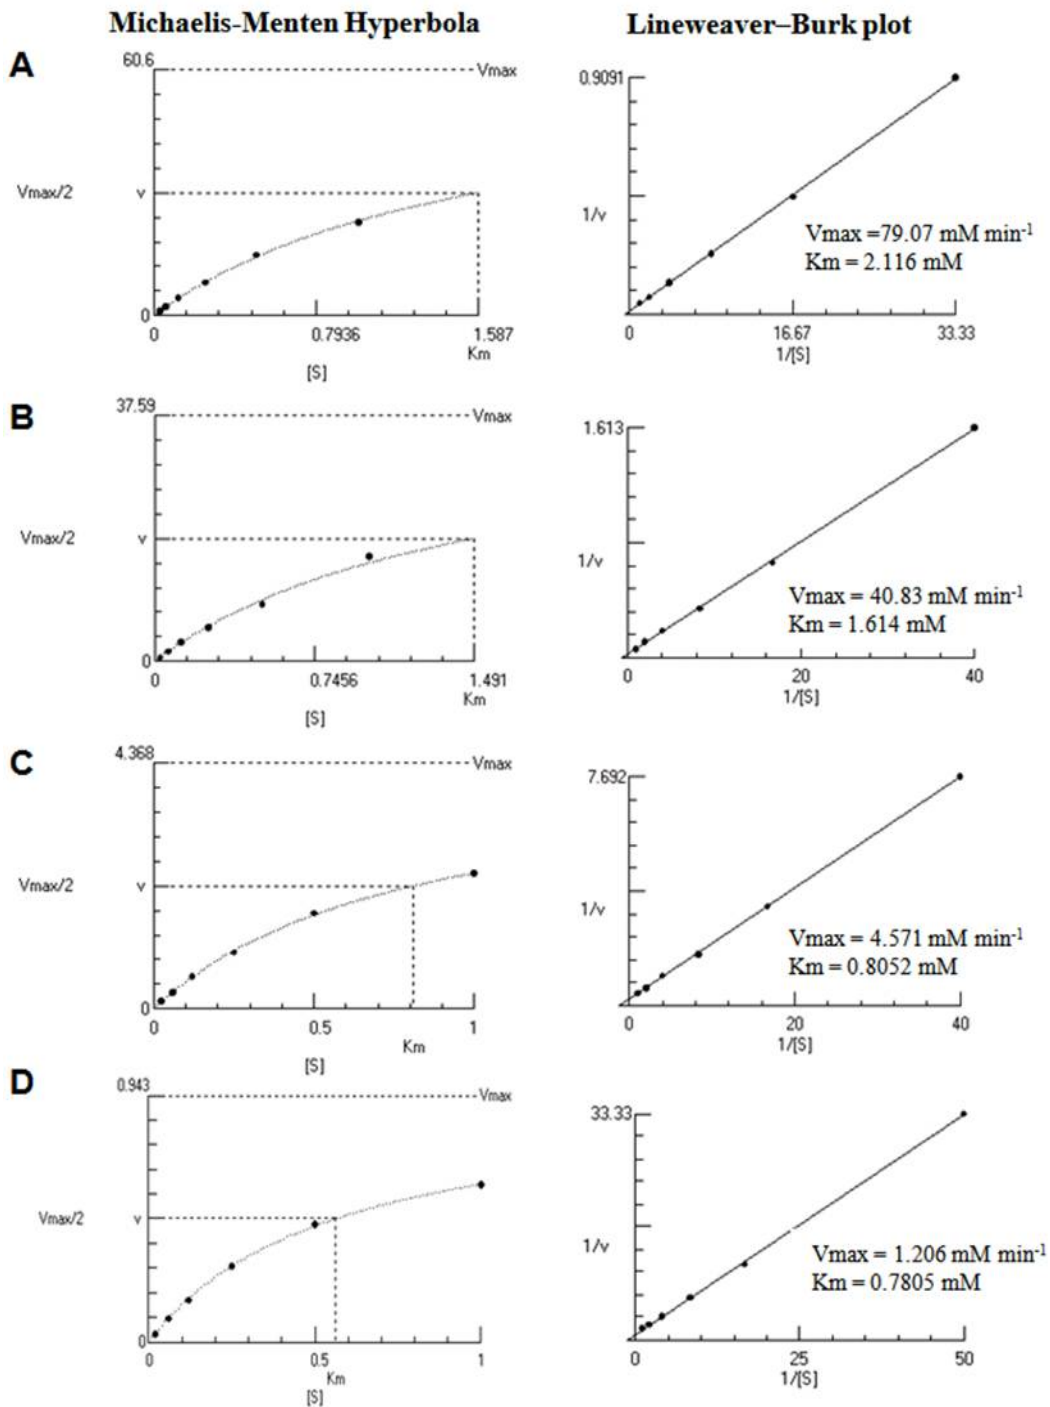

36 **Kinetic activity of native and recombinant Sc-SP-1.** Kinetic activity of native and recombinant  
 37 proteins was measured against AAPF-pNA substrate (A and C) and against AAPM-pNA (B and  
 38 D).  
 39

40 **FIGURE S4.**  
41

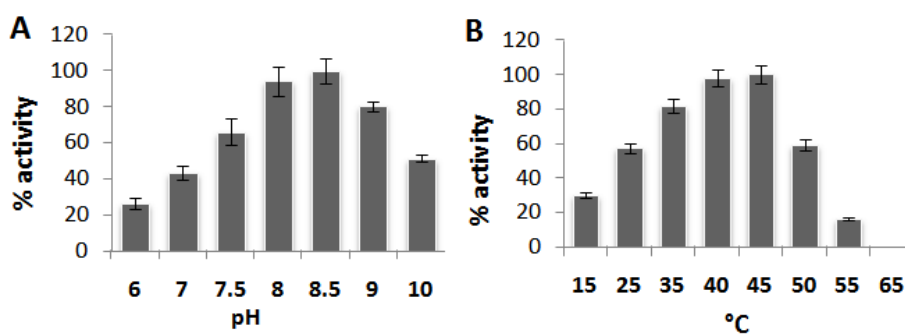

42 **pH and temperature dependence of Sc-SP-1.** Enzymatic activity was measured with 0.1 mM of  
43 the purified enzyme on the AAPF-pNA substrate in buffers ranging from pH 6 to 10 (A). The  
44 optimal temperature determined in optimal pH buffer and on the AAPF-pNA substrate (B).  
45  
46
